# Supplementary material for: Understanding the stimuli responsive behavior of polyion grafted nanoparticles in the presence of salt and polyelectrolytes
Source: Royal Society of Chemistry journal article supplement (doi:10.1039/d2sm00650b), 2022-01-01
Supplement: d2sm00650b1.pdf [file d2sm00650b1.pdf]

# **Understanding the stimuli responsive behavior of polyion grafted nanoparticles in the presence of salt and polyelectrolytes**

Rajesh Pavan Pothukuchi and Mithun Radhakrishna\*

*Discipline of Chemical Engineering, Indian Institute of Technology (IIT) Gandhinagar,  
Palaj, Gujarat 382355, India*

E-mail: [mithunr@iitgn.ac.in](mailto:mithunr@iitgn.ac.in)

## **Supplementary information**

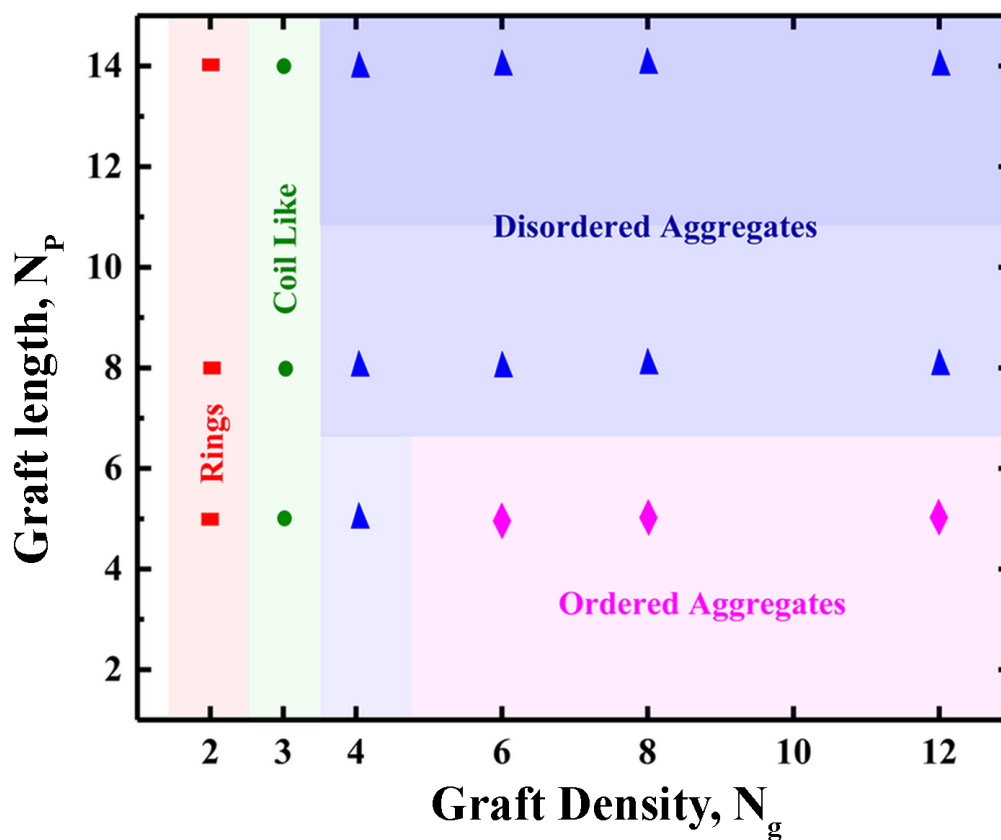

Figure S1: Phase morphology of electrostatic-driven self-assembly of nanoparticles grafted with oppositely charged polyions in an implicit solvent (water) at a temperature  $T^* = 1.0$  as a function of graft density ( $N_g$ ) and graft length ( $N_p$ ) at  $\lambda_B = 2\sigma$ , "Reprinted (adapted) with permission from " Charge-Driven Self-Assembly of Polyelectrolyte-Grafted Nanoparticles in Solutions, Rajesh Pavan Pothukuchi, Vinod Kumar Prajapat, and Mithun Radhakrishna, Langmuir 2021 37 (41), 12007-12015, DOI: 10.1021/acs.langmuir.1c01571". Copyright 2021 American Chemical Society."

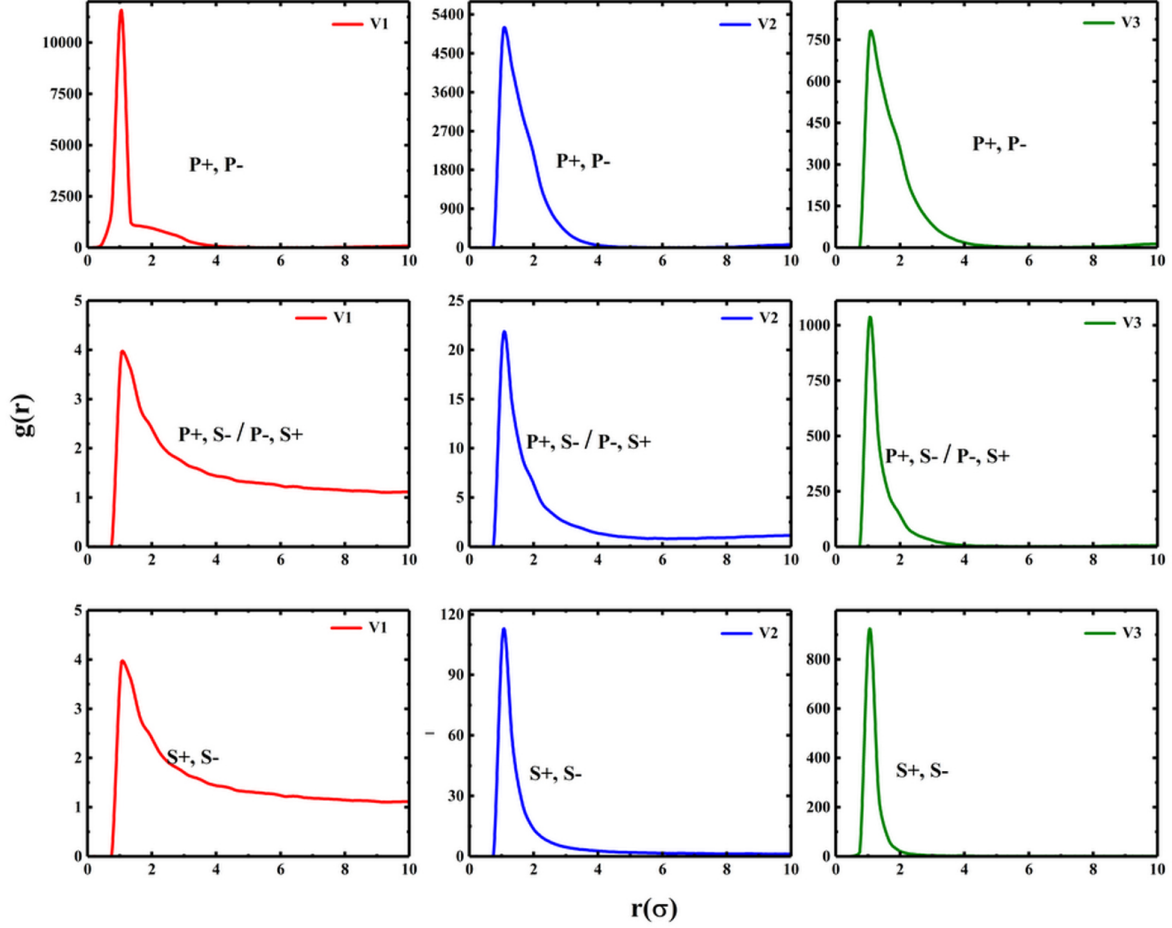

Figure S2: Radial distribution (pair correlation) functions between polycation, polyanion (P+,P-); salt cation, salt anion (S+,S-) and polyion and the oppositely charged salt ions (P+,S-/P-,S+) at different salt valency for the polyion grafted nanoparticle system at a grafting density  $N_g = 2$  at a salt concentration of  $C_S = 2.5$  mM and diameter  $\sigma_S = \sigma$  for chain length  $N_P = 8$ . V1, V2 and V3 represent system with univalent, divalent and trivalent salt ions.

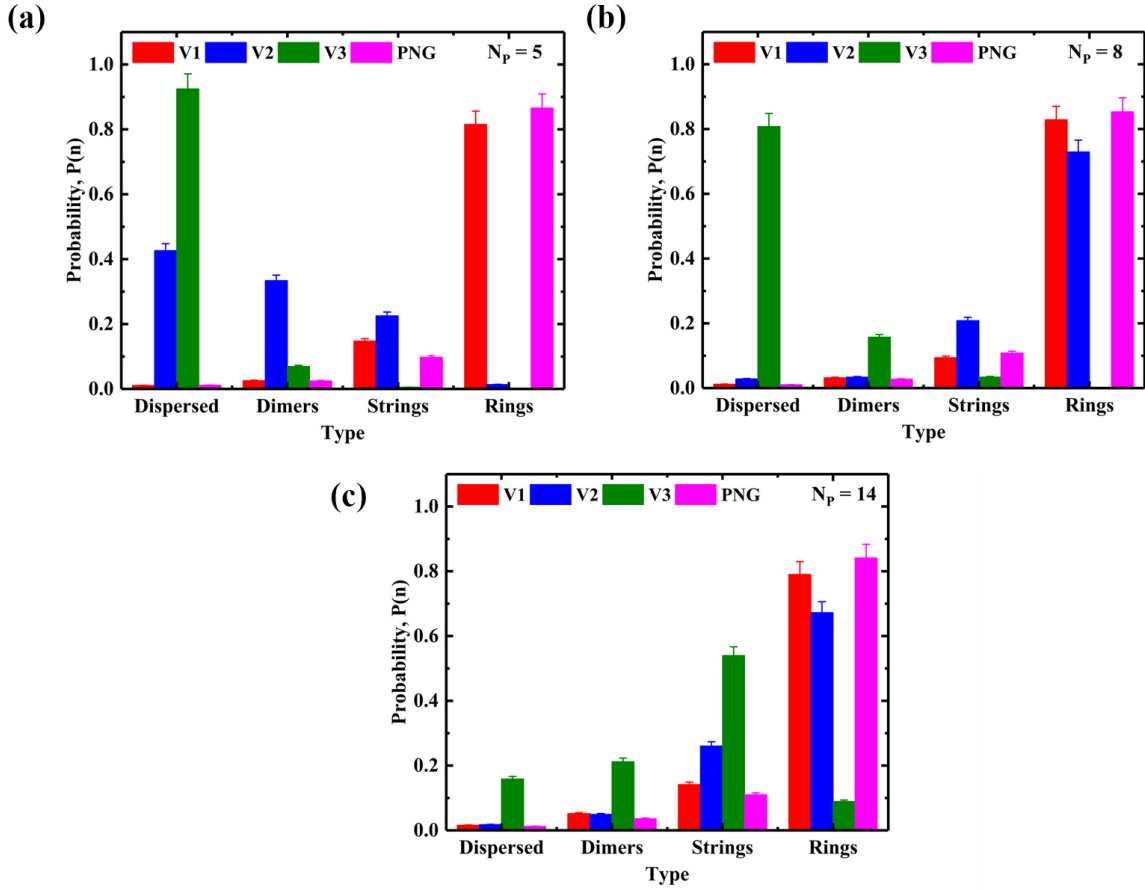

Figure S3: Probability distribution of various morphologies of the polyion grafted nanoparticle system at a grafting density  $N_g = 2$  at a salt concentration of  $C_S = 5$  mM when  $\sigma_S = \sigma$  a)  $N_P = 5$  b)  $N_P = 8$  and c)  $N_P = 14$ . V1, V2 and V3 represent system with univalent, divalent and trivalent salt ions.  $\lambda_B = 2\sigma$ . PNG represents the primary nanoparticle graft system in the absence of salt

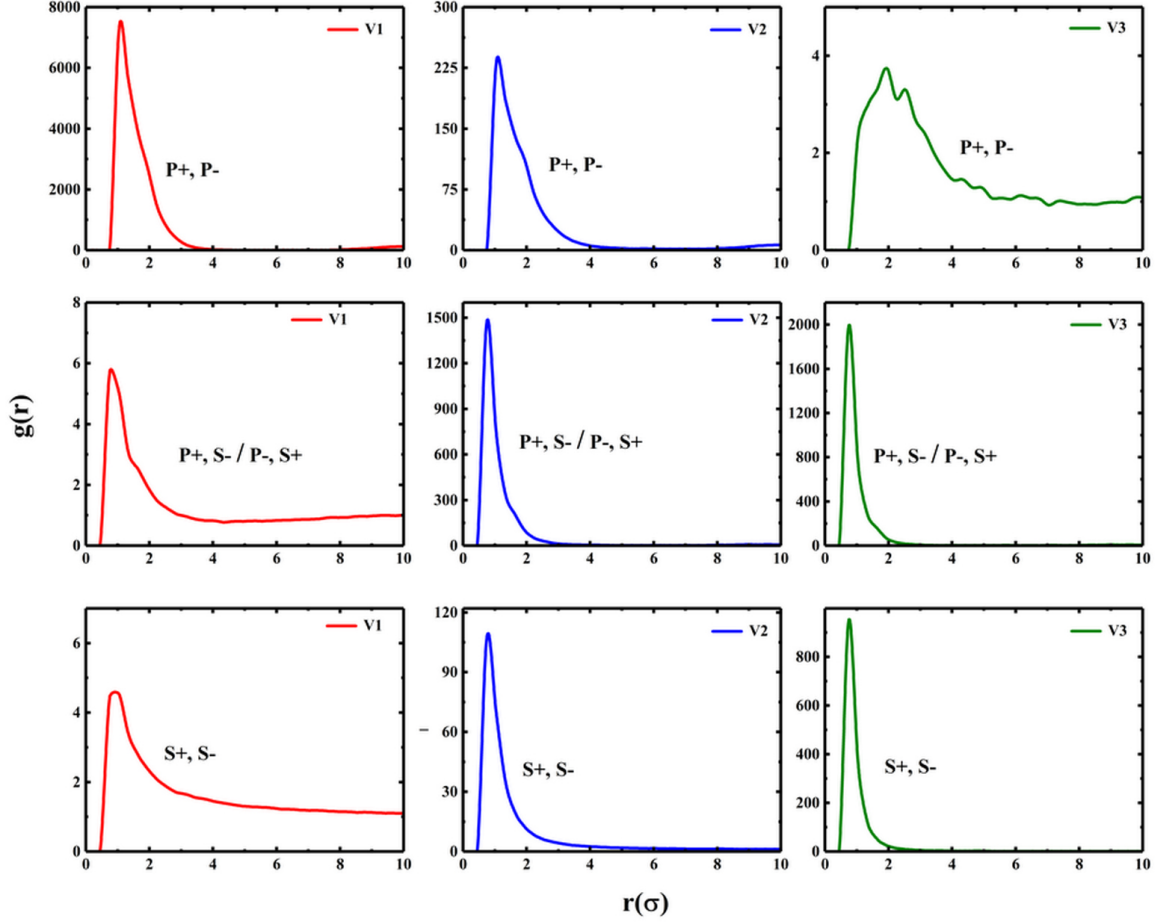

Figure S4: Radial distribution (pair correlation) functions between polycation, polyanion (P+,P-); salt cation, salt anion (S+,S-) and polyion and the oppositely charged salt ions (P+,S-/P-,S+) at different salt valency for the polyion grafted nanoparticle system at a grafting density  $N_g = 2$  at a salt concentration of  $C_S = 2.5$  mM and diameter  $\sigma_S = 0.5\sigma$  for chain length  $N_P = 5$ . V1, V2 and V3 represent system with univalent, divalent and trivalent salt ions.

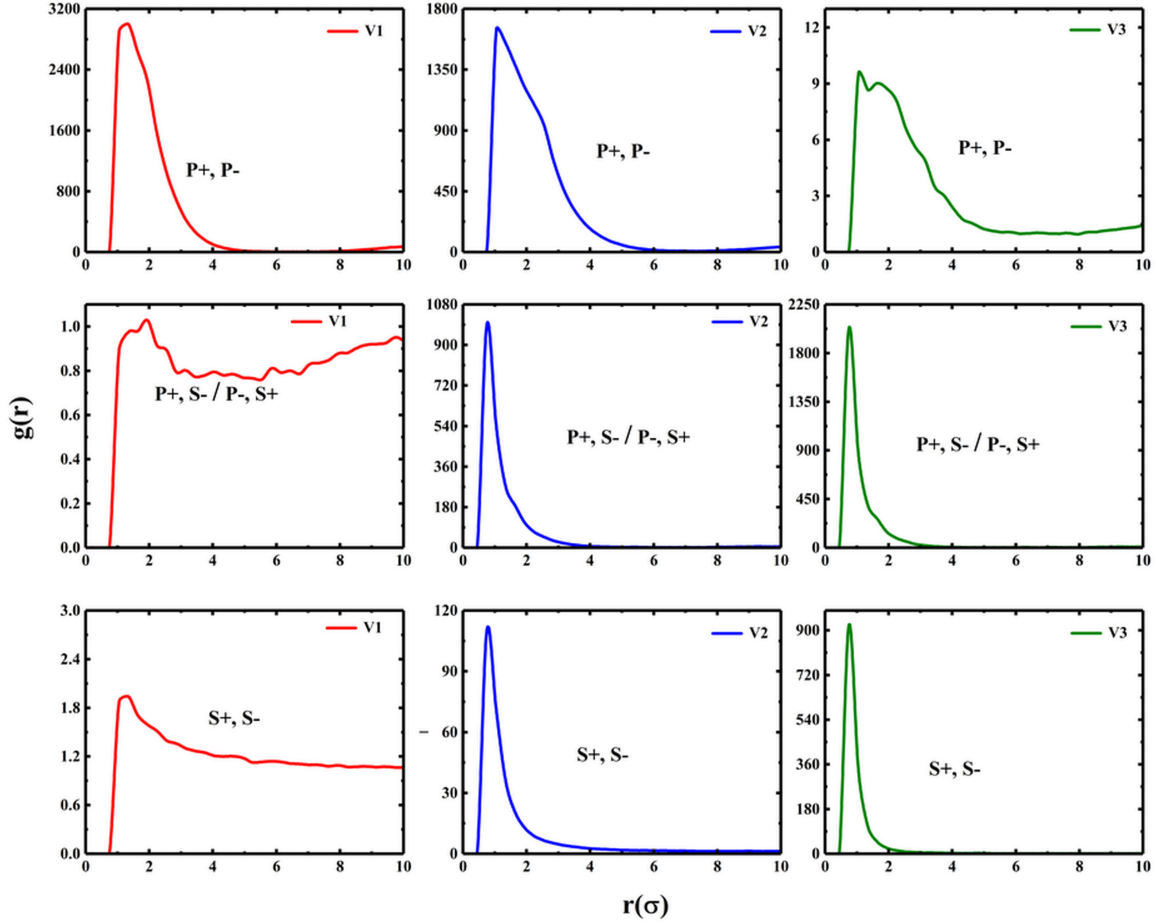

Figure S5: Radial distribution (pair correlation) functions between polycation, polyanion (P+,P-); salt cation, salt anion (S+,S-) and polyion and the oppositely charged salt ions (P+,S-/P-,S+) at different salt valency for the polyion grafted nanoparticle system at a grafting density  $N_g = 2$  at a salt concentration of  $C_S = 2.5$  mM and diameter  $\sigma_S = 0.5\sigma$  for chain length  $N_P = 8$ . V1, V2 and V3 represent system with univalent, divalent and trivalent salt ions.

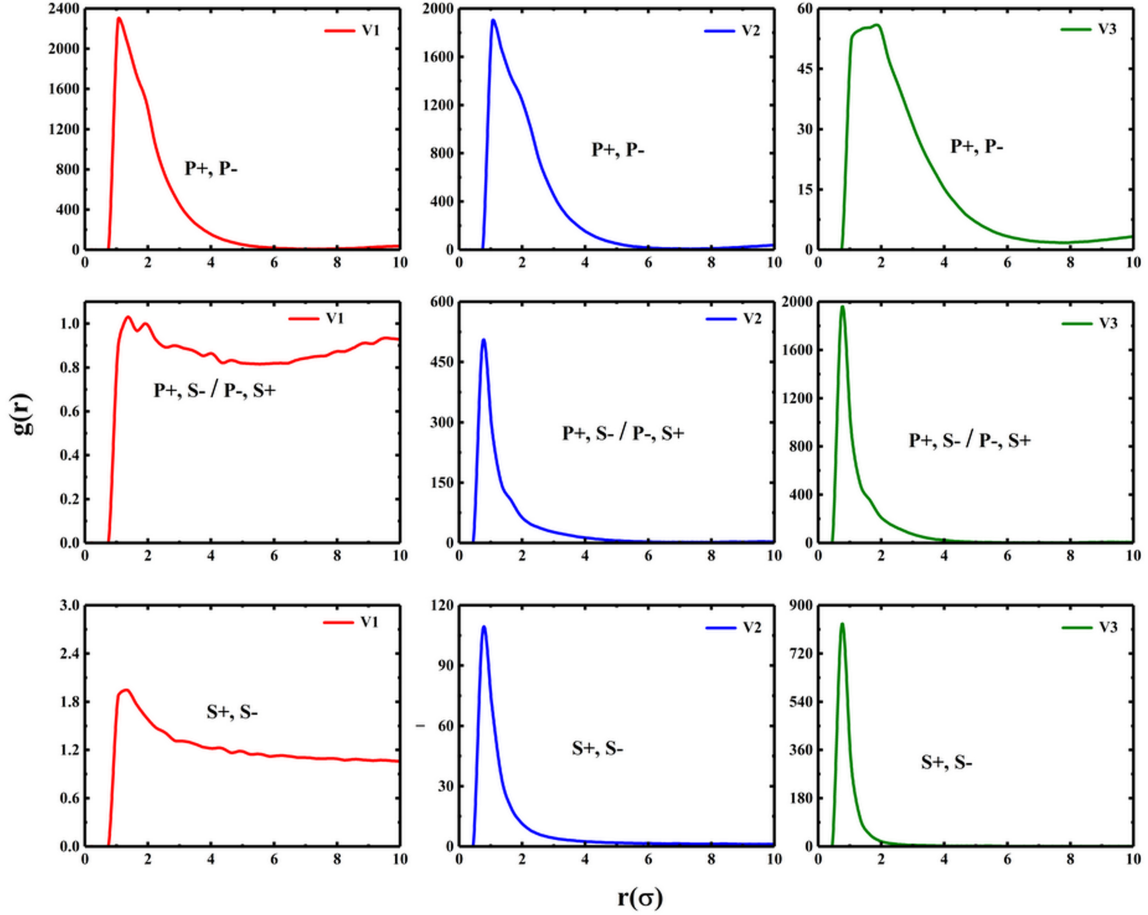

Figure S6: Radial distribution (pair correlation) functions between polycation, polyanion (P+,P-); salt cation, salt anion (S+,S-) and polyion and the oppositely charged salt ions (P+,S-/P-,S+) at different salt valency for the polyion grafted nanoparticle system at a grafting density  $N_g = 2$  at a salt concentration of  $C_S = 2.5$  mM and diameter  $\sigma_S = 0.5\sigma$  for chain length  $N_P = 14$ . V1, V2 and V3 represent system with univalent, divalent and trivalent salt ions.

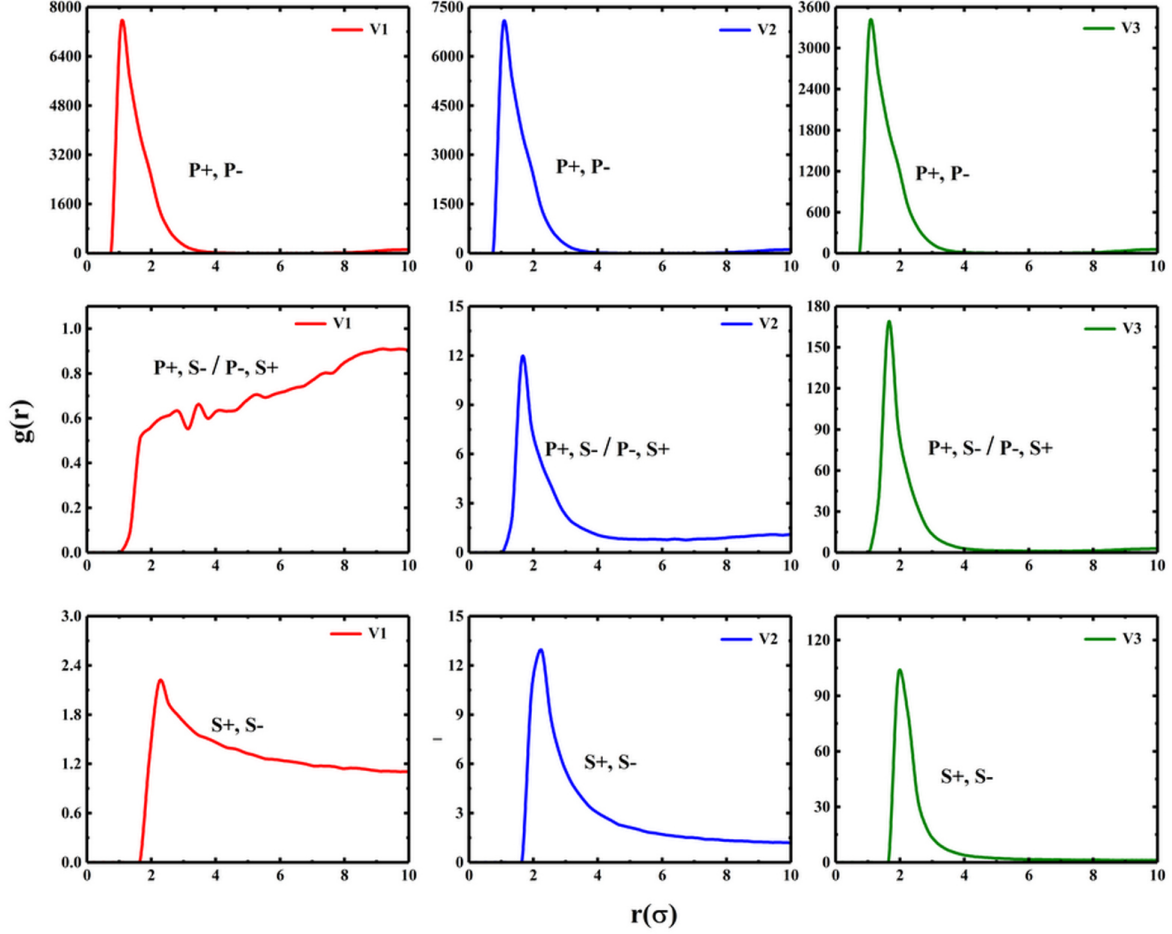

Figure S7: Radial distribution (pair correlation) functions between polycation, polyanion (P+,P-); salt cation, salt anion (S+,S-) and polyion and the oppositely charged salt ions (P+,S-/P-,S+) at different salt valency for the polyion grafted nanoparticle system at a grafting density  $N_g = 2$  at a salt concentration of  $C_S = 2.5$  mM and diameter  $\sigma_S = 2\sigma$  for chain length  $N_P = 5$ . V1, V2 and V3 represent system with univalent, divalent and trivalent salt ions.



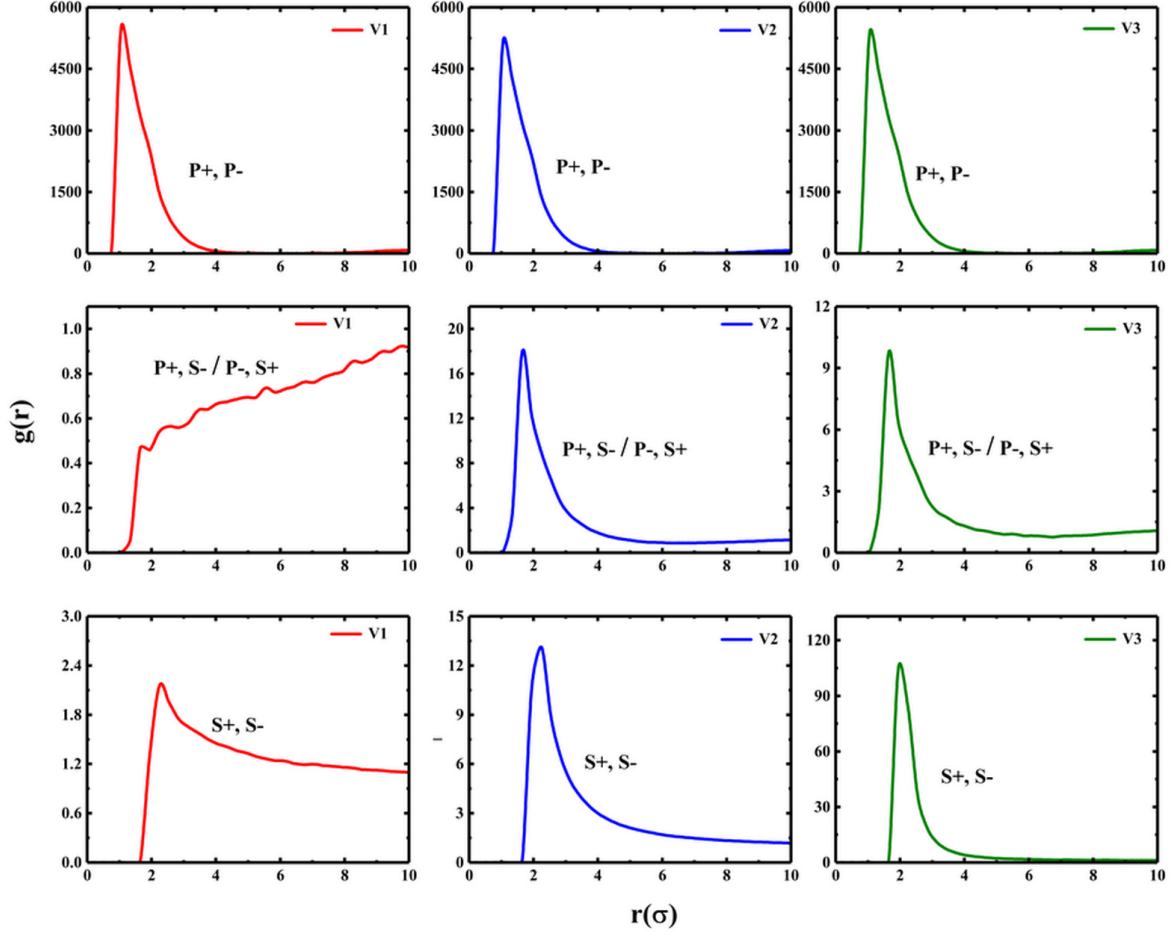

Figure S8: Radial distribution (pair correlation) functions between polycation, polyanion (P+,P-); salt cation, salt anion (S+,S-) and polyion and the oppositely charged salt ions (P+,S-/P-,S+) at different salt valency for the polyion grafted nanoparticle system at a grafting density  $N_g = 2$  at a salt concentration of  $C_S = 2.5$  mM and diameter  $\sigma_S = 2\sigma$  for chain length  $N_P = 8$ . V1, V2 and V3 represent system with univalent, divalent and trivalent salt ions.

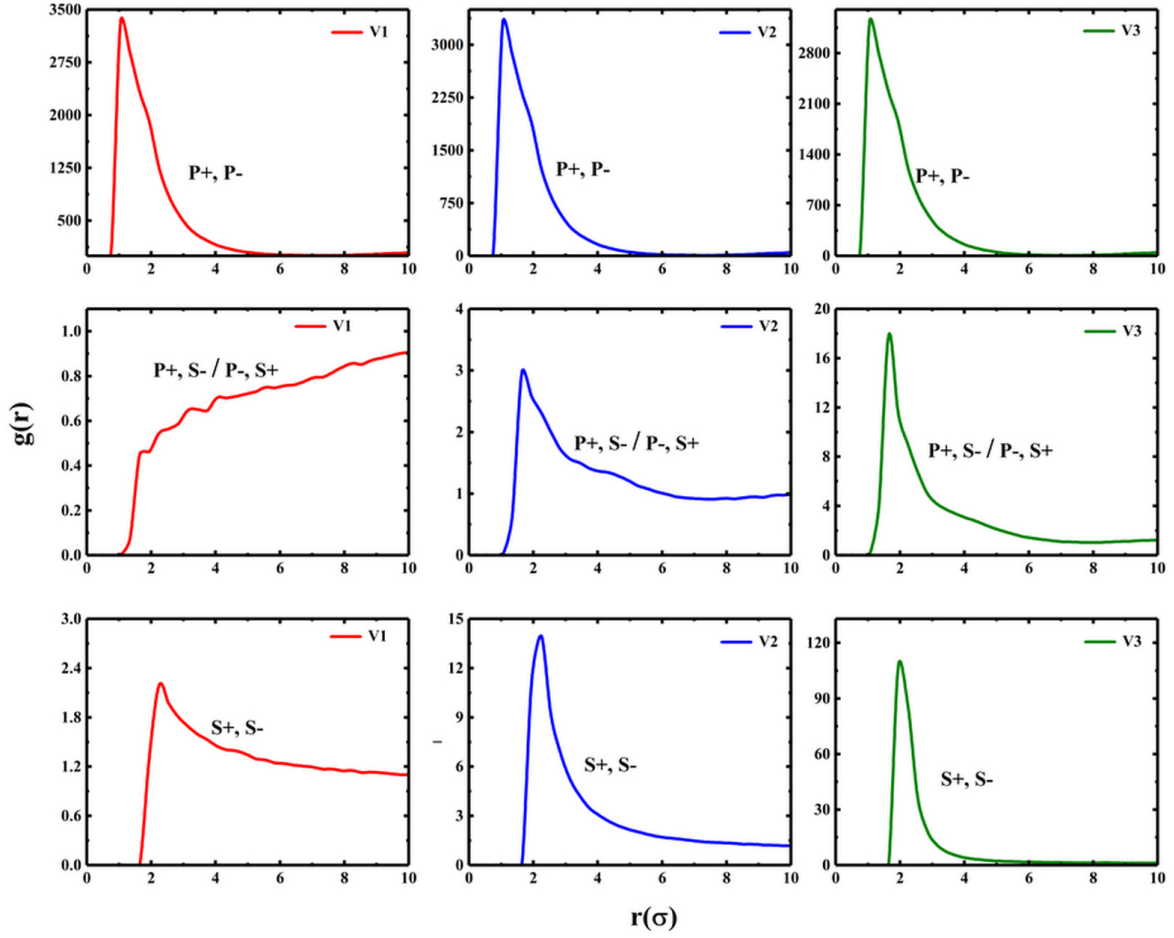

Figure S9: Radial distribution (pair correlation) functions between polycation, polyanion (P+,P-); salt cation, salt anion (S+,S-) and polyion and the oppositely charged salt ions (P+,S-/P-,S+) at different salt valency for the polyion grafted nanoparticle system at a grafting density  $N_g = 2$  at a salt concentration of  $C_S = 2.5$  mM and diameter  $\sigma_S = 2\sigma$  for chain length  $N_P = 14$ . V1, V2 and V3 represent system with univalent, divalent and trivalent salt ions.
